# Supplementary material
Source: publisher site journal article supplement (https://www.dovepress.com/article/587626)
Supplement: Supplementary file 1 [file 587626%20Supplementary%20Tables%201-2.docx]

**Supplementary Table 1. Anxiety and depression scores between the esketamine and control groups（PP）**

|  | Esketamine (n = 41) | Control (n = 39) | *p* Value |
| --- | --- | --- | --- |
| Preoperative |  |  | *P* |
| HADS-A | 5.00(3.00,6.00) | 5.00(4.00,7.50) | 0.323 |
| HADS-D | 5.00(3.00,7.00) | 5.00(3.50,7.00) | 1.000 |
| POD1 |  |  |  |
| HADS-A | 6.00(4.00,8.00) | 4.00(3.00,6.00) | 0.023* |
| HADS-D | 6.00(3.00,8.00) | 4.00(2.00,6.00) | 0.056 |
| POD3 |  |  |  |
| HADS-A | 5.00(4.00,7.00) | 3.00(3.00,5.00) | 0.002* |
| HADS-D | 6.00(3.00,7.00) | 4.00(2.00,6.00) | 0.058 |
| POD7 |  |  |  |
| HADS-A | 5.00(4.00,7.50) | 4.00(2.00,5.00) | 0.008* |
| HADS-D | 5.00(4.00,7.00) | 4.00(2.00,6.00) | 0.051 |
| POD14 |  |  |  |
| HADS-A | 6.00(4.50,7.00) | 4.00(2.00,6.00) | 0.013* |
| HADS-D | 5.00(4.00,7.00) | 4.00(3.00,5.00) | 0.022* |

Note: Data are presented as median with IQR.

**P*<0.05;

Abbreviations: POD1, the first day after surgery; POD3, the third day after surgery; POD7, the seventh day after surgery; POD14, the fourteenth day after surgery;

HADS-A, Hospital Anxiety and Depression Scale Anxiety subscale; HADS-D, Hospital Anxiety and Depression Scale Depression subscale.

Abbreviations: POD1, the first day after surgery; POD3, the third day after surgery; POD7, the seventh day after surgery; POD14, the fourteenth day after surgery;

HADS-A, Hospital Anxiety and Depression Scale Anxiety subscale; HADS-D, Hospital Anxiety and Depression Scale Depression subscale.

**Supplementary Table 2. Anxiety and depression scores between the esketamine and control groups（ITT）**

|  | Esketamine (n = 46) | Control (n = 46) | *p* Value |
| --- | --- | --- | --- |
| Preoperative |  |  | *P* |
| HADS-A | 4.93±3.23 | 5.22±2.59 | 0.644 |
| HADS-D | 4.89±2.51 | 5.26±2.78 | 0.506 |
| POD1 |  |  |  |
| HADS-A | 4.50±2.90 | 5.67±2.38 | 0.036* |
| HADS-D | 4.35±2.62 | 5.67±2.67 | 0.018* |
| POD3 |  |  |  |
| HADS-A | 4.35±2.81 | 5.63±2.00 | 0.013* |
| HADS-D | 4.09±2.81 | 5.17±2.40 | 0.049* |
| POD7 |  |  |  |
| HADS-A | 4.26±2.88 | 5.48±2.35 | 0.029* |
| HADS-D | 4.33±2.59 | 5.43±2.18 | 0.029* |
| POD14 |  |  |  |
| HADS-A | 4.49±2.90 | 5.74±2.48 | 0.041* |
| HADS-D | 4.34±2.12 | 5.38±2.41 | 0.043* |

Note: Data are presented as median with IQR.

**P*<0.05;

Abbreviations: POD1, the first day after surgery; POD3, the third day after surgery; POD7, the seventh day after surgery; POD14, the fourteenth day after surgery;

HADS-A, Hospital Anxiety and Depression Scale Anxiety subscale; HADS-D, Hospital Anxiety and Depression Scale Depression subscale.

Abbreviations: POD1, the first day after surgery; POD3, the third day after surgery; POD7, the seventh day after surgery; POD14, the fourteenth day after surgery;

HADS-A, Hospital Anxiety and Depression Scale Anxiety subscale; HADS-D, Hospital Anxiety and Depression Scale Depression subscale.
